# Supplementary material
Source: publisher figshare collection journal article supplement (https://frontiersin.figshare.com/ndownloader/files/13381724)
Supplement: Supplementary file [file 13381724]

**Table S2.** Robustness Check 2 – Replication across Moroccan and Turkish origin subgroups: Comparative model fit of unconstrained, fully and partially constrained multi-level multi-group path models

|                                                                                                                                | Number of<br>free parameters | Loglikelihood | SCF    | SB $\Delta\text{Chi}^2(df)$ |
|--------------------------------------------------------------------------------------------------------------------------------|------------------------------|---------------|--------|-----------------------------|
| <i>Unconstrained model (baseline)</i>                                                                                          | 101                          | - 25135.568   | 1.2696 |                             |
| <i>Fully constrained model (model 1)</i><br>(imposing equality constraints on all 6 theoretical associations<br>across groups) | 95                           | - 25144.180   | 1.2730 | 14.167(6), $p = 0.028$      |
| <i>Partially constrained model (model 2)</i><br>(freely estimating 1 differential association across groups)                   | 96                           | - 25139.341   | 1.2740 | 6.367(5), $p = 0.272$       |

*Notes.* Model 1 imposes equality constraints on the associations: (1) of perceived national fit in separated, integrated and assimilated vignettes with national self-identification, and (2) of perceived acceptance with perceived national fit in the same vignettes. Model 2 freely estimates only the association of perceived acceptance with fit for the separated vignette, which was stronger for the Moroccan than for the Turkish group (Wald  $\chi^2(1) = 6.473, p = 0.011$ ). SCF = Scaling Correction Factor. SB = Santorra Bentler.
